# Supplementary material for: Developmental Programming: Prenatal Testosterone Excess and Insulin Signaling Disruptions in Female Sheep
Source: PubMed Central journal article supplement — Biol Reprod. 2016 Apr 6;94(5):113. doi: 10.1095/biolreprod.115.136283 (PMC4939741; doi:10.1095/biolreprod.115.136283), 2016-04-06
Supplement: supp_115.136283_biolreprod.115.136283-1.pdf [file supp_115.136283_biolreprod.115.136283-1.pdf]

**Lu et al., Supplemental Table S1.** Primary antibodies and dilutions used in the Western blot analyses.

| <b>Peptide/protein target</b>                   | <b>Name of Antibody</b>                                        | <b>Catalog #</b> | <b>Species raised in;<br/>monoclonal or polyclonal</b> | <b>Dilution<br/>used</b> |
|-------------------------------------------------|----------------------------------------------------------------|------------------|--------------------------------------------------------|--------------------------|
| Phospho-GSK-3 $\beta$ (Ser9)                    | Phospho-GSK-3 $\beta$ (Ser9)                                   | 9336             | Rabbit, polyclonal                                     | 1:1000                   |
| GSK-3 $\beta$                                   | GSK-3 $\beta$ (27C10)                                          | 9315             | Rabbit, monoclonal                                     | 1:1000                   |
| Phospho-Akt (Ser473)                            | Phospho-Akt (Ser473) (D9E) XP                                  | 4060             | Rabbit, monoclonal                                     | 1:1000                   |
| Akt (pan)                                       | Akt (pan) (C67E7)                                              | 4691             | Rabbit, monoclonal                                     | 1:1000                   |
| Phospho-mTOR (Ser2448)                          | Phospho-mTOR (Ser2448)                                         | 2971             | Rabbit, polyclonal                                     | 1:1000                   |
| mTOR                                            | mTOR                                                           | 2972             | Rabbit, polyclonal                                     | 1:1000                   |
| Phospho-p70 S6 Kinase<br>(Thr421/Ser424)        | Phospho-p70 S6 Kinase<br>(Thr421/Ser424)                       | 9204             | Rabbit, polyclonal                                     | 1:1000                   |
| p70 S6 Kinase                                   | p70 S6 Kinase (49D7)                                           | 2708             | Rabbit, monoclonal                                     | 1:1000                   |
| Phospho-p44/42 MAPK<br>(Erk1/2) (Thr202/Tyr204) | Phospho-p44/42 MAPK (Erk1/2)<br>(Thr202/Tyr204) (D13.14.4E) XP | 4370             | Rabbit, monoclonal                                     | 1:1000                   |
| p44/42 MAPK (Erk1/2)                            | p44/42 MAPK (Erk1/2) (137F5)                                   | 4695             | Rabbit, monoclonal                                     | 1:1000                   |
| GAPDH                                           | GAPDH (14C10) (HRP Conjugate)                                  | 3683             | Rabbit, monoclonal                                     | 1:1000                   |
| $\beta$ -Actin                                  | $\beta$ -Actin (13E5)                                          | 4970             | Rabbit, monoclonal                                     | 1:1000                   |
| GLUT4                                           | Anti-glucose transporter 4 (GLUT4)                             | 37445            | Rabbit, polyclonal                                     | 1:1000                   |
